# Supplementary material for: Characterisation and comparison of the mucosa-associated bacterial communities across the gastrointestinal tract of stranded green turtles, Chelonia mydas
Source: PubMed Central journal article supplement (PMC7755585; doi:10.3934/microbiol.2020022), 2020-10-19
Supplement: microbiol-06-04-022-s001.pdf [file microbiol-06-04-022-s001.pdf]

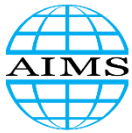

*Research article*

**Characterisation and comparison of the mucosa-associated bacterial communities across the gastrointestinal tract of stranded green turtles, *Chelonia mydas***

**Mohammad Shamim Ahasan<sup>1,2,\*</sup>, Thomas B. Waltzek<sup>3</sup>, Leigh Owens<sup>1</sup> and Ellen Ariel<sup>1</sup>**

<sup>1</sup> College of Public Health, Medical and Veterinary Sciences, James Cook University, Townsville, 4811, Qld, Australia

<sup>2</sup> Faculty of Veterinary and Animal Sciences, Hajee Mohammad Danesh Science and Technology University, Dinajpur 5200, Rangpur, Bangladesh

<sup>3</sup> College of Veterinary Medicine, University of Florida, Gainesville, FL, 32610, USA

\* **Correspondence:** Email: mdshamim.ahasan@my.jcu.edu.au; Tel: +61469851186.

**Supplementary Tables**

**Table S1.** Identification number, age-class and morphometric data of each green turtle at arrival. T1: turtle 1, T2: turtle 2, T3: turtle 3 and T4: turtle 4.

| Details               | T 1                   | T 2                   | T 3                   | T 4                   |
|-----------------------|-----------------------|-----------------------|-----------------------|-----------------------|
| Identification number | QA54944               | QA56724               | QA56888               | QA56344               |
| Location              | Whitsunday Beach, QLD | Whitsunday Beach, QLD | Whitsunday Beach, QLD | Whitsunday Beach, QLD |
| Age-class             | Juvenile              | Juvenile              | Juvenile              | Adult                 |
| Body weight (kg)      | 6.1                   | 8.2                   | 12                    | 100                   |
| CCL (cm)              | 48                    | 48.2                  | 52.3                  | 102                   |

**Table S2.** The abundance of 11 shared OTUs across the gastrointestinal tract of green turtles. ES: Oesophagus, ST: Stomach, SI: Small intestine and LI: Large intestine.

| Operational taxonomic units (OTU)                | Cumulative abundance (%) |        |        |        |
|--------------------------------------------------|--------------------------|--------|--------|--------|
|                                                  | ES                       | ST     | SI     | LI     |
| Proteobacteria_f_Vibrionaceae_17162              | 0.67                     | 1.515  | 23.023 | 18.348 |
| Fusobacteria_o_Fusobacteriales_19186             | 4.04                     | 0.085  | 0.07   | 0.01   |
| Firmicutes_g_Terrisporobacter_6106               | 0.05                     | 0.775  | 0.008  | 0.09   |
| Firmicutes_g_s_uncultured_Clostridium_sp._s_9532 | 0.775                    | 7.345  | 0.298  | 6.17   |
| Firmicutes_g_s_uncultured_bacterium_s_808        | 1.165                    | 6.487  | 0.055  | 23.76  |
| Firmicutes_g_s_uncultured_bacterium_s_20735      | 0.202                    | 10.502 | 0.058  | 3.367  |
| Firmicutes_g_Clostridium_sensu_stricto_1_14141   | 0.08                     | 0.178  | 0.082  | 0.168  |
| Firmicutes_g_Ambiguous_taxa_s_8680               | 5.46                     | 2.282  | 0.158  | 0.012  |
| Firmicutes_f_Peptostreptococcaceae_17846         | 0.922                    | 10.912 | 0.62   | 2.203  |
| Firmicutes_f_Clostridiaceae_1_7975               | 0.842                    | 0.64   | 0.155  | 3.635  |
| Cyanobacteria_c_Chloroplast_22627                | 0.022                    | 0.028  | 0.188  | 0.04   |
| Bacteroidetes_g_s_uncultured_bacterium_s_13932   | 0.67                     | 1.515  | 23.023 | 18.348 |

## Supplementary Figures

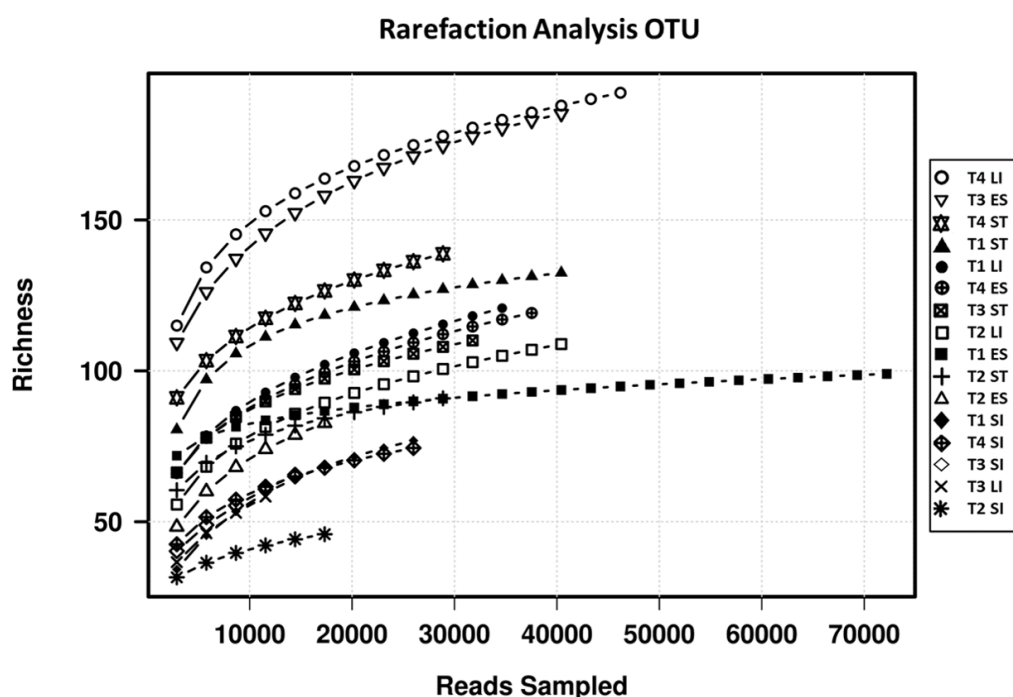

**Figure S1.** Rarefaction analysis based on operational taxonomic unit (OTUs) (3% divergence) in the samples from different regions of the gastrointestinal tract of green turtles. ES: Oesophagus, ST: Stomach, SI: Small intestine and LI: Large intestine.

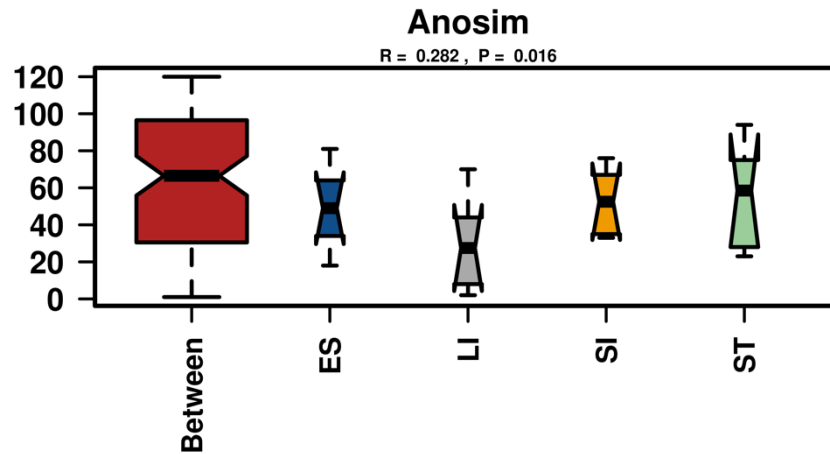

**Figure S2.** Analysis of Similarity (ANOSIM) in the samples from different regions of the gastrointestinal tract of green turtles using weighted UniFrac distance metric at OTU level.

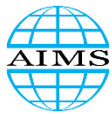

AIMS Press

© 2020 the Author(s), licensee AIMS Press. This is an open access article distributed under the terms of the Creative Commons Attribution License (<http://creativecommons.org/licenses/by/4.0>)
